# Supplementary material for: Controlled sulfidation of silver: a pathway to Ag 2 S for short-term synaptic emulation
Source: Royal Society of Chemistry journal article supplement (doi:10.1039/d5ma01446h), 2026-01-01
Supplement: d5ma01446h1.pdf [file d5ma01446h1.pdf]

# Controlled Sulfidation of Silver: A Pathway to Ag<sub>2</sub>S for Short-Term Synaptic Emulation

Shreepooja Bhat<sup>1</sup>, Namitha B<sup>1</sup>, Nanditha T.K<sup>1</sup>, Rajashekhar Pujar<sup>2</sup>, Gurumurthy S.C<sup>1\*</sup>

<sup>1</sup>*Nano and Functional Materials Lab (NFML), Department of Physics, Manipal Institute of Technology, Manipal Academy of Higher Education, Manipal -576104, Karnataka, India*

<sup>2</sup>*Manipal Institute of Applied Physics, Manipal Academy of Higher Education, Manipal, Karnataka-576104, India*

**Corresponding author:** [gurumurthy.sc@manipal.edu](mailto:gurumurthy.sc@manipal.edu)

## Supporting Information

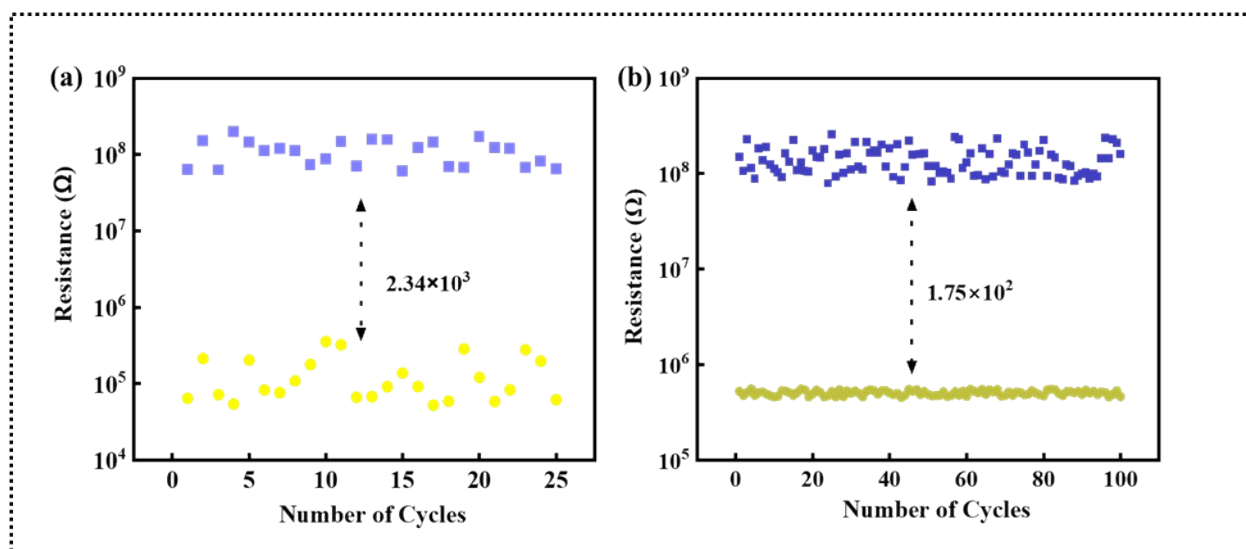

Fig.S1. Endurance graph of (a) 100 μA current compliance (b) 10 μA current compliance.

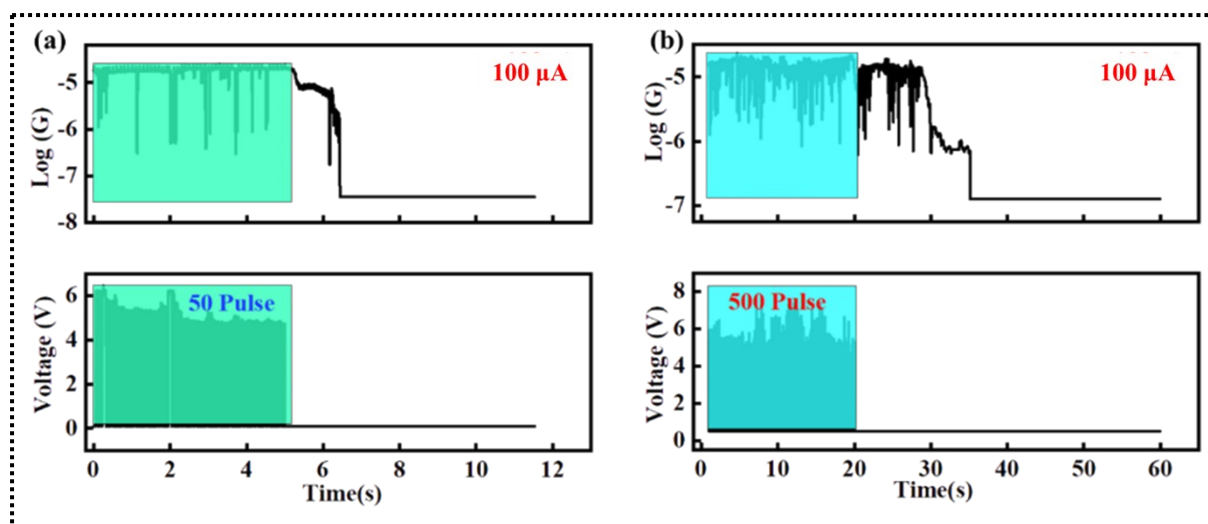

Fig.S2. Conductance potentiation and decay for (a) 50 pulse (green) and (b) 500 pulse 100  $\mu$ A undercurrent limit following pulsed stimulation.

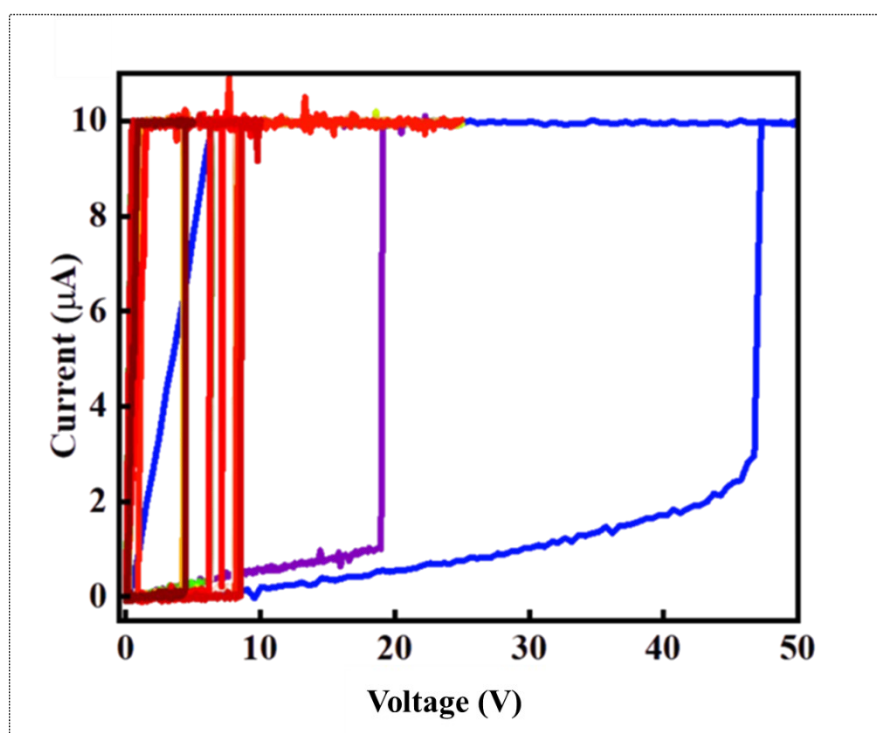

Fig.S3. RS switching of Ag/Ag<sub>2</sub>S/Ag device after multiple cycle showing stable switching between 4.5 V to 5.5 V.

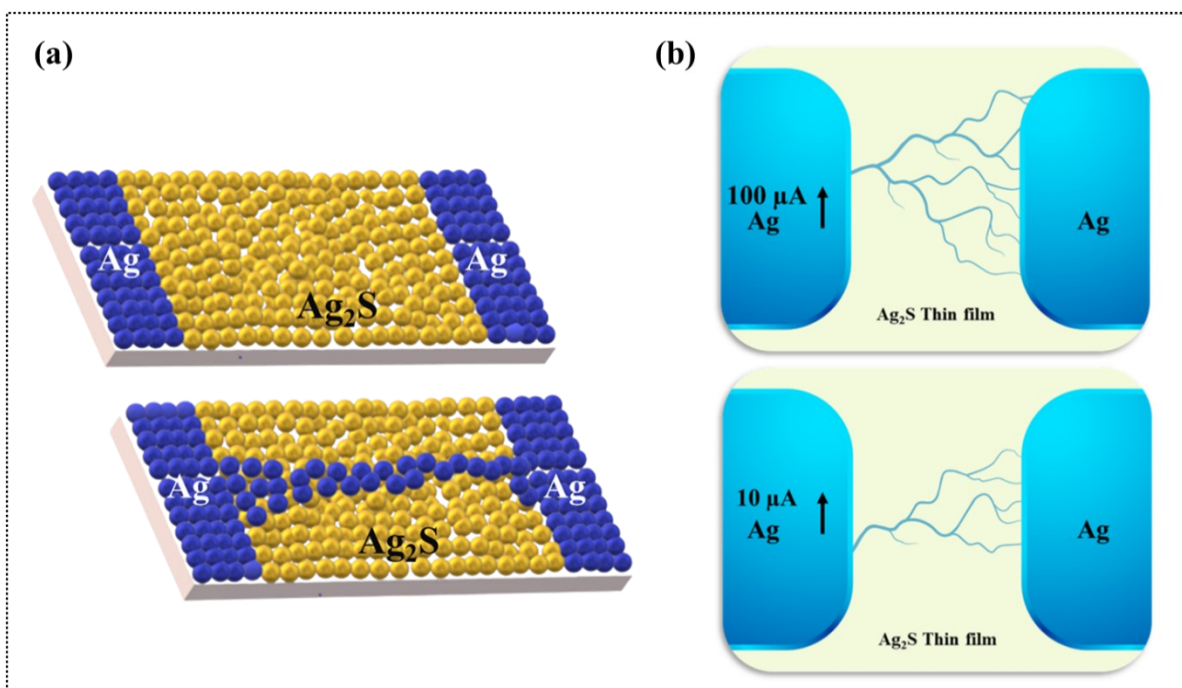

*Scheme. S1. (a) ECM mechanism of Ag/Ag<sub>2</sub>S/Ag device illustrating the influence of current compliance on conducting filament morphology: (b) high-density CFs formed at 100 μA compliance and low-density CFs formed at 10 μA compliance.*

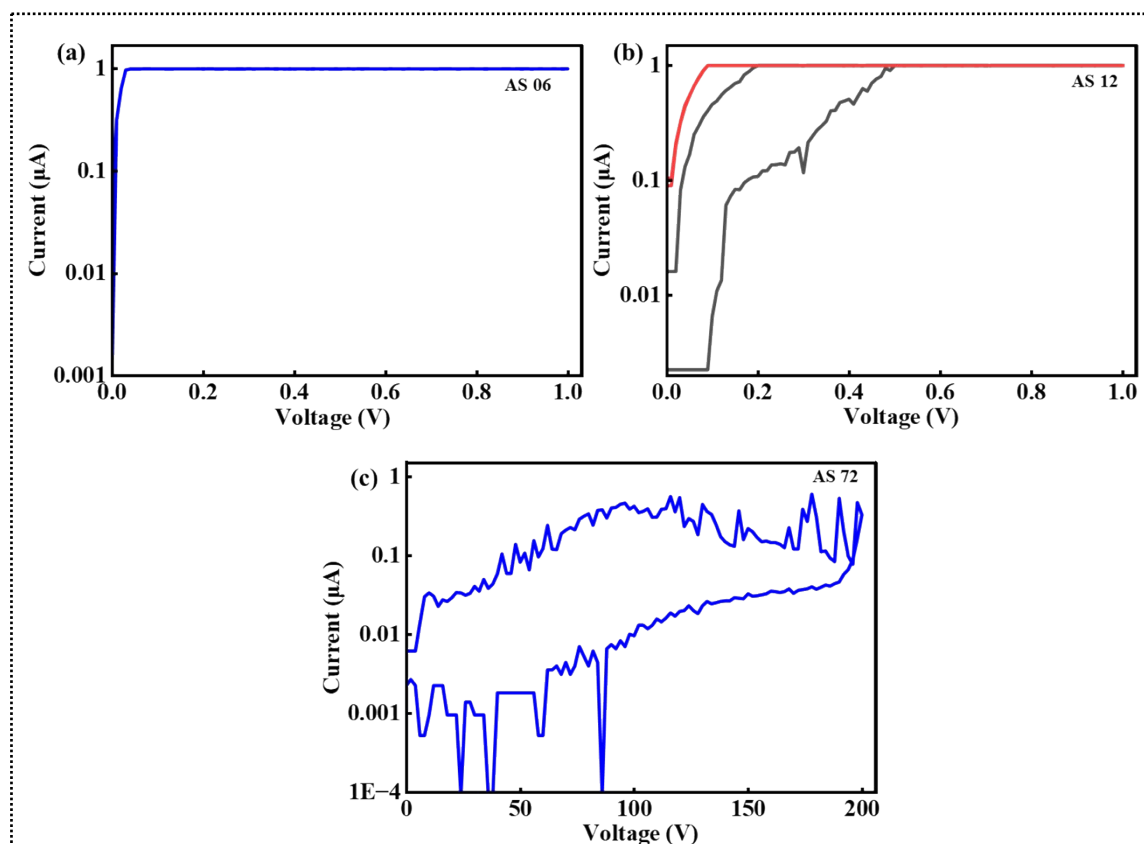

*Fig.S4. Current–voltage (*I-V*) characteristics of Ag/Ag<sub>2</sub>S/Ag devices prepared at different reaction times: (a) Ag/AS 06/Ag exhibiting stable ohmic conduction, (b) Ag/AS 12/Ag*

showing an initial non-ohmic response followed by conductive behavior from the second cycle, and (c) Ag/AS 72/Ag displaying non-conductive characteristics.

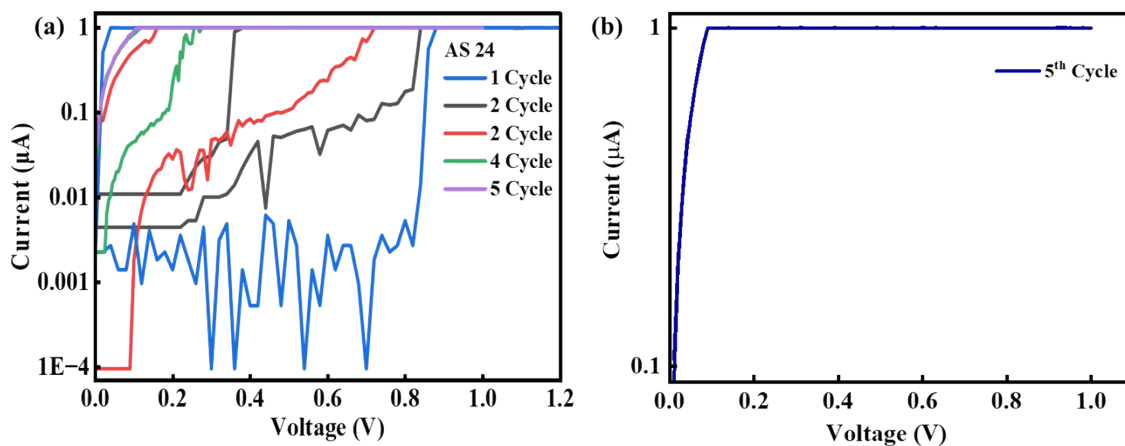

Fig.S5. Current–voltage ( $I$ – $V$ ) characteristics of the Ag/Ag<sub>2</sub>S/Ag device for 24 hours reaction time: (a)  $I$ – $V$  response over five consecutive cycles showing resistive switching during the first four cycles, and (b) the 5<sup>th</sup> cycle exhibiting stable conductive behavior due to permanent filament formation.
